## IMMUNOLocalIZATION OF $\text{Na}^+, \text{K}^+$ -ATPase IN OSMOREGULATORY ORGANS DURING THE EMBRYONIC AND POST-EMBRYONIC DEVELOPMENT OF THE LOBSTER *HOMARUS GAMMARUS*

S. Khodabandeh, G. Charmantier, and M. Charmantier-Daures

(SK; GC; MCD; correspondence) Equipe Adaptation Ecophysiologique et Ontogénèse, UMR 5171 GPIA, Université Montpellier II, cc 092, 34095 Montpellier cedex 05, France (mireille.charmantier@univ-montp2.fr);

(SK) Faculty of Marine Sciences, University of Tarbiat Modarres, Tehran, Iran (surp78@yahoo.com)

### ABSTRACT

Immunolocalization and ontogenetical changes in  $\text{Na}^+, \text{K}^+$ -ATPase were investigated in the antennal glands, intestine, and branchial cavity in developing *Homarus gammarus*. The antennal glands lined by undifferentiated cells are detectable in embryos at stage EI 150  $\mu\text{m}$  (EI: eye index; 640  $\mu\text{m}$  at hatching). From a mesodermic sac and an ectodermic tubular epithelium (EI 225  $\mu\text{m}$ ), they develop into coelomosac, labyrinth, and bladder up to larval stage II. In larval stage III, the end parts of the labyrinth fold inward. In the first post-larvae, the coelomosac is completely enclosed in the folded labyrinth, there is no nephridial tubule. The definitive organization of the antennal gland found in adults is achieved in post-larval stage V. At EI 425  $\mu\text{m}$ , the intestine epithelium is composed of cuboidal cells, and the branchial cavity is already formed at EI 325  $\mu\text{m}$ . The presence of  $\text{Na}^+, \text{K}^+$ -ATPase was detected on the basolateral side of ionocytes lining the epithelium sac of the antennal gland starting at EI 425  $\mu\text{m}$ , in the intestine at EI 625  $\mu\text{m}$ , and in the epipodites of the branchial cavity at EI 525  $\mu\text{m}$ . In post-larvae (stage V), a strong fluorescence was also found on the inner-side of the branchiostegite epithelium. Thus the ontogeny of the osmoregulatory epithelia is completed only after metamorphosis and it conditions the occurrence of the adult pattern of osmoregulation.

### INTRODUCTION

Crustaceans have adapted to habitats of constant or variable salinity through different mechanisms of osmoregulation based in particular on the function of specialized cells, the ionocytes, located in various tissues and organs (reviews in Mantel and Farmer, 1983; Péqueux, 1995; Charmantier et al., 2001; Lucu and Towle, 2003). Three sites, the antennal glands, the gut and the branchial cavity, are involved in excretory and ion-regulatory functions in decapod crustaceans through effective ion transport, mainly of  $\text{Na}^+$  and  $\text{Cl}^-$  and in ion transport-linked water movements. In these crustaceans, transport of sodium ions out of the cell into the haemolymph is driven by the activity of  $\text{Na}^+, \text{K}^+$ -ATPase, a key enzyme which utilises ATP as source of energy (De Renzis and Bornancin, 1984; reviews by Towle, 1981, 1984a, b; Péqueux, 1995; Charmantier, 1998; Charmantier et al., 2001; Lucu and Towle, 2003). The precise cellular location of this enzyme is important in the investigation of the ontogeny of osmoregulation. Recently, immunohistochemical localization of  $\text{Na}^+, \text{K}^+$ -ATPase has been recognized as a useful method for locating the ionocytes in tissues and organs of decapods (Barradas et al., 1999; Lignot and Charmantier, 1999; Lignot et al., 2005; Cieluch et al., 2004; Khodabandeh et al., 2005b).

In adult *Homarus gammarus*, each antennal gland is composed of a central coelomosac surrounded ventrally by a voluminous labyrinth, dorsally by a voluminous bladder; in contrast to freshwater species, there is no nephridial tubule (Khodabandeh et al., 2005c). The intestine of decapods crustaceans is a tube connecting the foregut to the hindgut. It is lined by a simple columnar epithelium that is

gently folded to produce low longitudinal ridges or folds (Mykles, 1979). From a morphological point of view, the cells of the various parts of the gut are typical of salt-transporting epithelia (Mykles, 1977, 1979; Holliday and Miller, 1984; Palackal et al., 1984). The gut of hypo-osmoregulators, as well as of terrestrial species, is the site of active salt extrusion (Green et al., 1959; Towle, 1981).

The two branchial cavities of *H. gammarus* are sheltered by branchiostegites and each one contains 20 trichobranchiate gills and seven epipodites (Haond et al., 1998; Lignot and Charmantier, 1999). In this species, the epipodite cells present characteristic features of ionocytes and they possess  $\text{Na}^+, \text{K}^+$ -ATPase immunoreactivity (Haond et al., 1998; Lignot and Charmantier, 2001). In individuals maintained at low salinity, these characters have also been observed on the inner-side of the branchiostegite epithelium (Haond et al., 1998).

Lobsters live partly in coastal waters and can also occupy estuarine habitats (Jury et al., 1994; Lawton and Lavalli, 1995), where salinity fluctuates. Berried lobster females are known to migrate from deeper waters to shallow waters in spring (Campbell, 1986, Campbell and Jones, 1990). These movements result in the exposure of the females, late embryos and early larvae to potential variations in salinity (review in Charmantier et al., 2001). Among the different ontogenetic patterns of osmoregulation defined by Charmantier et al. (2001), the third prevails in homarid lobsters. Embryos do not osmoregulate (Charmantier and Aiken, 1987); the three planktonic larval stages are osmoconformers and benthic postmetamorphic stages are slight hyper-isoregulators (Charmantier et al., 1988; Thuet et al.,

1988) as are the adults (Dall, 1970; Charmantier et al., 1984). At low salinity, they are able to slightly hyperosmoregulate (Charmantier et al., 1984). In *H. gammarus*,  $\text{Na}^+, \text{K}^+$ -ATPase has recently been localized in the branchial cavity during early development and in one-year old juveniles (Lignot et al., 1999; Lignot and Charmantier, 2001), and in the antennal glands of the adults (Khodabandeh et al., 2005c).

Although much information is now available on the structure and ion regulatory capacity of the various osmoregulatory organs in juvenile and adult crustaceans, the number of related investigations in embryonic and early post-embryonic stages is still limited (Felder et al., 1986; Bouaricha et al., 1991a, b; Charmantier, 1998; Cieluch et al., 2004, 2005; Khodabandeh et al., 2005a, b). In particular, the localization of the osmoregulatory structures and of  $\text{Na}^+, \text{K}^+$ -ATPase in the antennal glands and in the intestine during the development of homarid lobsters is still unknown.

The aims of the present study were: 1) to describe the ontogeny of the antennal glands; and 2) to immunolocalize the  $\text{Na}^+, \text{K}^+$ -ATPase in the antennal glands, the intestine, and the branchial cavity during the embryonic and post-embryonic development of the European lobster *H. gammarus*.

## MATERIALS AND METHODS

### Animals

Adult berried females of *H. gammarus* caught off the coast of Brittany and obtained from a shellfish retailer (Les Viviers de Roscoff, Roscoff, France) were maintained at the Montpellier laboratory in individual compartments containing aerated and re-circulated (Eheim systems) natural seawater ( $35.0 \pm 1.3\text{‰}$ ,  $20 \pm 1^\circ\text{C}$ ) and fed three times a week with mussels. The photoperiod was held constant at 12 h light and 12 h dark cycles. The rate of embryonic development was monitored by measuring the size of the eyes and calculating the eye index (EI) according to the method of Perkins (1972) adapted to the European species of lobster (Charmantier and Mounet-Guillaume, 1992). Hatching occurs for an eye index of approximately EI 640  $\mu\text{m}$  and delivers free pre-larvae. After hatching, larval stages I-III were maintained in planktonkreisels (Hughes et al., 1974) containing 40 litres of aerated and recirculated natural sea water. They were fed three times a day with frozen *Artemia* sp. For obtaining post-larvae stages IV and V, larval stages III were transferred to individual compartments containing aerated and recirculated seawater.

### Histology

The antennal glands of post-larvae stage V were surgically removed from cold-anesthetized animals and the cephalothorax of the larval stages (I, II, III) and post-larval stage (IV) were used. In late embryos, the vitellus was removed before fixation. For each stage, 5 individuals were observed. Sample fixation and other histological processes were performed as previously described (Khodabandeh et al., 2005a).

### Light Microscopy Immunofluorescence

Immunolocalization of  $\text{Na}^+, \text{K}^+$ -ATPase was performed by light microscopy immunofluorescence using a mouse monoclonal antibody. In crustaceans, this antiserum has previously been used in *Porcellio scaber* (Ziegler, 1997), *Homarus gammarus* (Lignot and Charmantier, 1999; Lignot et al., 2001; Khodabandeh et al., 2005c), *Astacus leptodactylus* (Khodabandeh et al., 2005b; Lignot et al., 2005), and *Carcinus maenas* (Cieluch et al., 2004). The methods of fixation of the specimens and the immunocytochemistry processes have been described in Khodabandeh et al. (2005b). Posterior gills of crab, *Pachygrapsus marmoratus*, were tested each time as a positive and specific control.

The immunolocalization of  $\text{Na}^+, \text{K}^+$ -ATPase was conducted at different embryonic stages (EI 225, 325, 425, 525, 625  $\mu\text{m}$ ), in larval stages I-III, in first post-larvae (stage IV), and in later post-larvae (stage V).

## RESULTS

### Histomorphology

**Antennal Glands.**—The future glands formed by undifferentiated cells are detectable at the meta-nauplius stage EI 150  $\mu\text{m}$ . At EI 225  $\mu\text{m}$ , the gland is composed of two parts, a tubular epithelium with columnar cells probably of ectodermic origin and a mass of undifferentiated mesodermic cells, the future coelomosac (not shown). Between EI 325 and EI 525  $\mu\text{m}$ , the tubular epithelium lengthens and folds dorsally around the coelomosac cells (Fig. 1A-C). In later embryonic stages EI 525 and 625  $\mu\text{m}$ , the tubule transforms into a sac with a clear lumen. The epithelium is lined by regular columnar cells with a centrally located nucleus (Fig. 1C, D). A duct leads from the ventral region of the ectodermic sac to the urinary pore (Fig. 1D). After hatching, in larval stages I and II, the glands are more voluminous, the coelomosac develops and the size of the lumen of the ectodermic sac increases markedly (Fig. 1E, F). The glands lie on the ventral floor of the anterior part of the cephalothorax but part of it extends into the basis of the antenna. In larval stage III, in-foldings of the tips of the epithelium sac increase in size to form the labyrinth (Fig. 1G) and the bladder differentiates (not shown). In the first post-larvae, stage IV, the coelomosac is completely enclosed in the gland, surrounded by an increased number of folds of the labyrinth (Fig. 1H, I). The coelomosac is located over the labyrinth and its dorsal face is attached to the ventral wall of the bladder (Fig. 1I). The connective tissue cells are present between the coelomosac and the labyrinth (Fig. 1I). In later post-larvae, stage V, each gland is composed of a centrally-located coelomosac surrounded, ventrally by a voluminous labyrinth (composed of three lobes), and dorsally by a large bladder; as in adults, there is no nephridial tubule.

**Intestine and the Branchial Cavity.**—At EI 425  $\mu\text{m}$ , the intestine epithelium forms a straight tube, composed of cuboidal cells (Fig. 2A). In later stages, the tube gently folds to produce longitudinal folds (Fig. 2B). After hatching, in larval stage I, longitudinal sections also show regularly-spaced transverse in-foldings and the columnar cells are very high with a central nucleus (Fig. 2C).

In adults, each branchial cavity contains 20 trichobranchiate gills and seven epipodites. The branchial cavity is already formed at EI 325  $\mu\text{m}$ . At EI 425  $\mu\text{m}$  and in later embryonic stages, the branchiostegite is lined by two epithelia facing each other, separated by a voluminous central hemolymphatic lacuna (Figs. 2D, E, 4H, I). During the embryonic development the epipodites and gills are present only in form of buds; in particular the gill lamellae are not fully developed (Fig. 2D, E). Each bud is formed of an epithelium with columnar cells surrounding a central space filled with undifferentiated embryonic cells and hemolymphatic lacunae (Fig. 2D, E).

### Immunolocalization of $\text{Na}^+, \text{K}^+$ -ATPase

**Antennal Glands.**—No specific fluorescence staining was observed in the future antennal gland in embryos at EI 325  $\mu\text{m}$  (Fig. 3A). The immunoreactivity of the  $\text{Na}^+, \text{K}^+$ -ATPase was first detected in the cells lining the epithelium

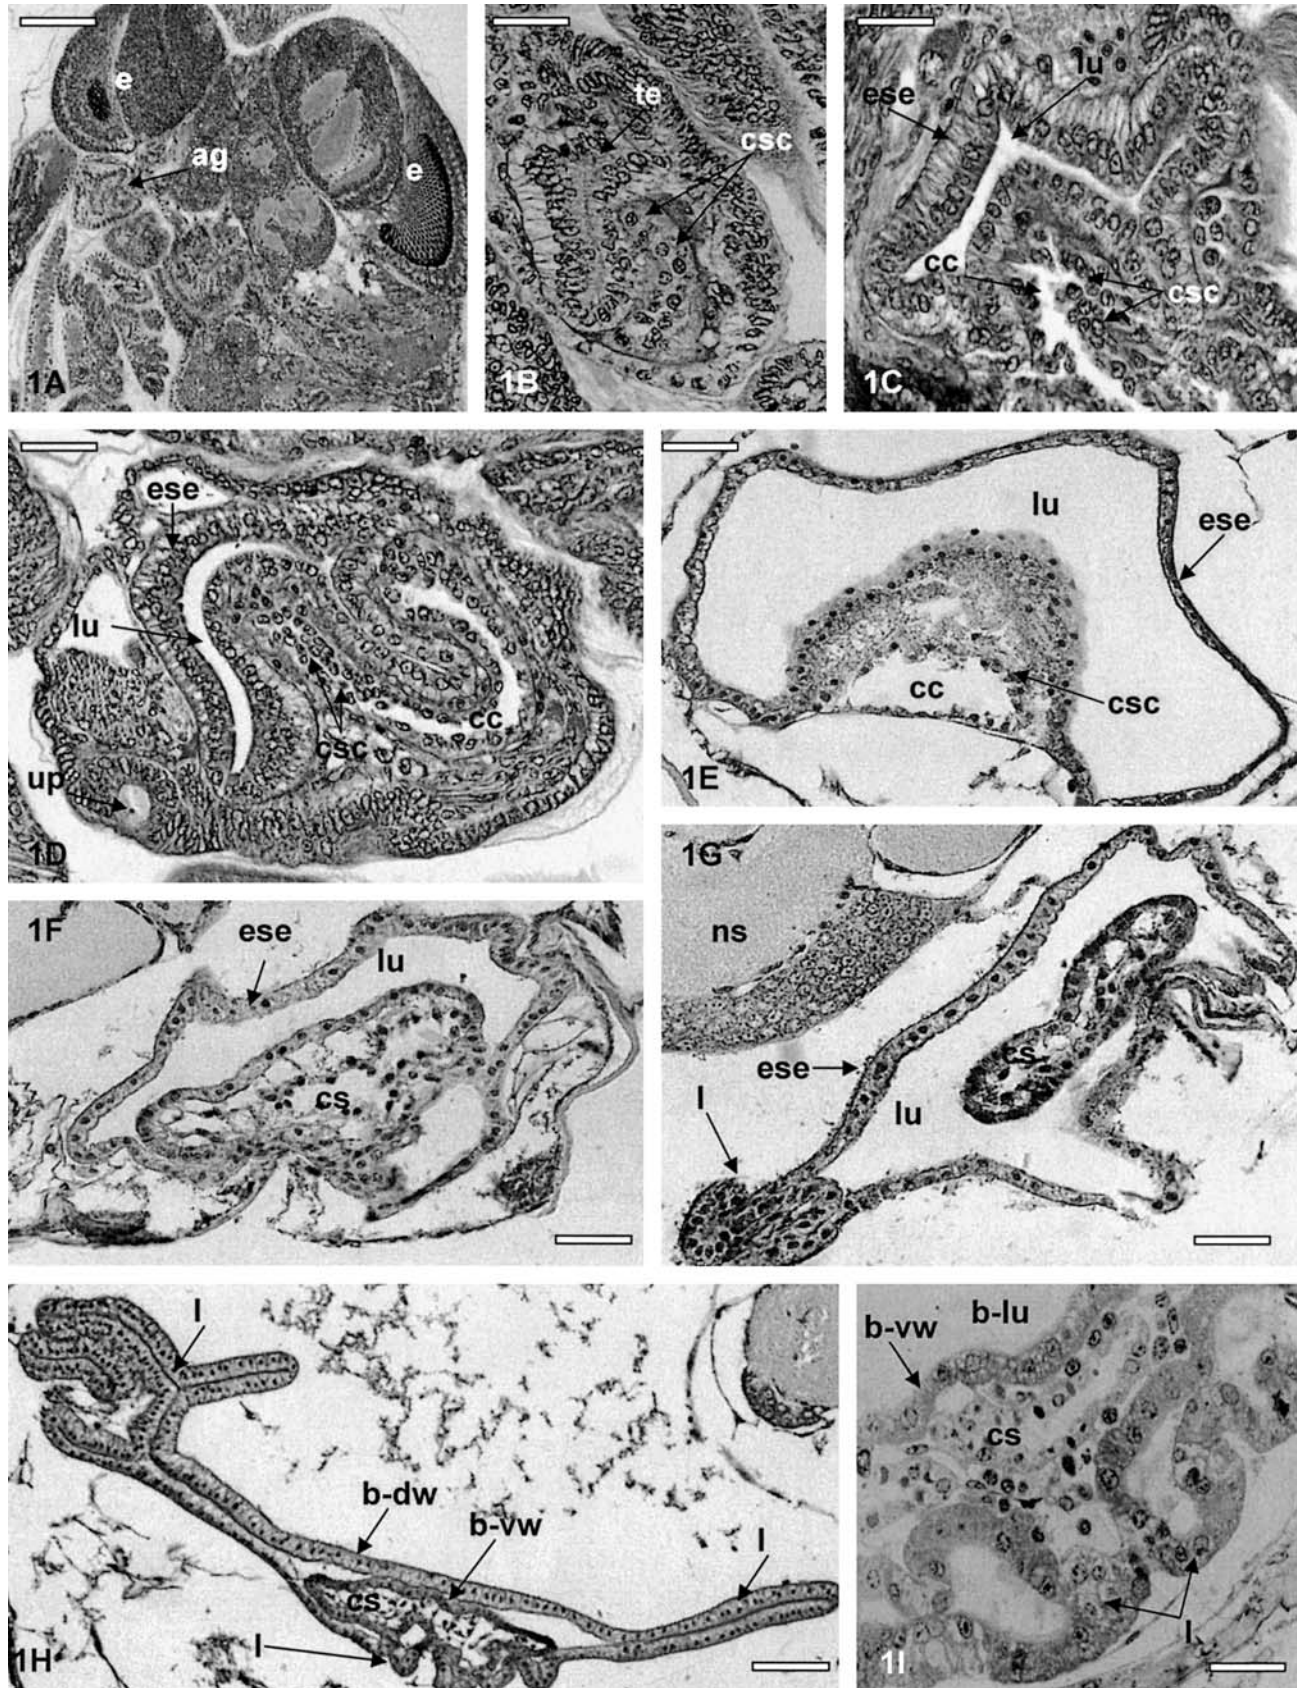

Fig. 1. *Homarus gammarus*. Light microscopy micrographs of the ontogeny of the antennal gland. (A, B) embryos at stage EI (eye index): 325  $\mu$ m. (C) EI: 525  $\mu$ m. (D) EI: 625  $\mu$ m. (E) Larval stage I. (F) Larval stage II. (G) Larval stage III. (H, I) Post-larval stage IV. Abbreviations: ag, antennal gland; b, bladder; b-lu, bladder lumen; b-dw, bladder dorsal wall; b-vw, bladder ventral wall; cc, coelomosac cavity; cs, coelomosac; csc, coelomosac cells; e, eye; ese, ectodermic sac epithelium; l, labyrinth; lu, lumen; te, tubular epithelium; up, urinary pore. Bars: 100  $\mu$ m (A, E, F, G, H), 20  $\mu$ m (B), 30  $\mu$ m (C), 40  $\mu$ m (D), 80  $\mu$ m (I).

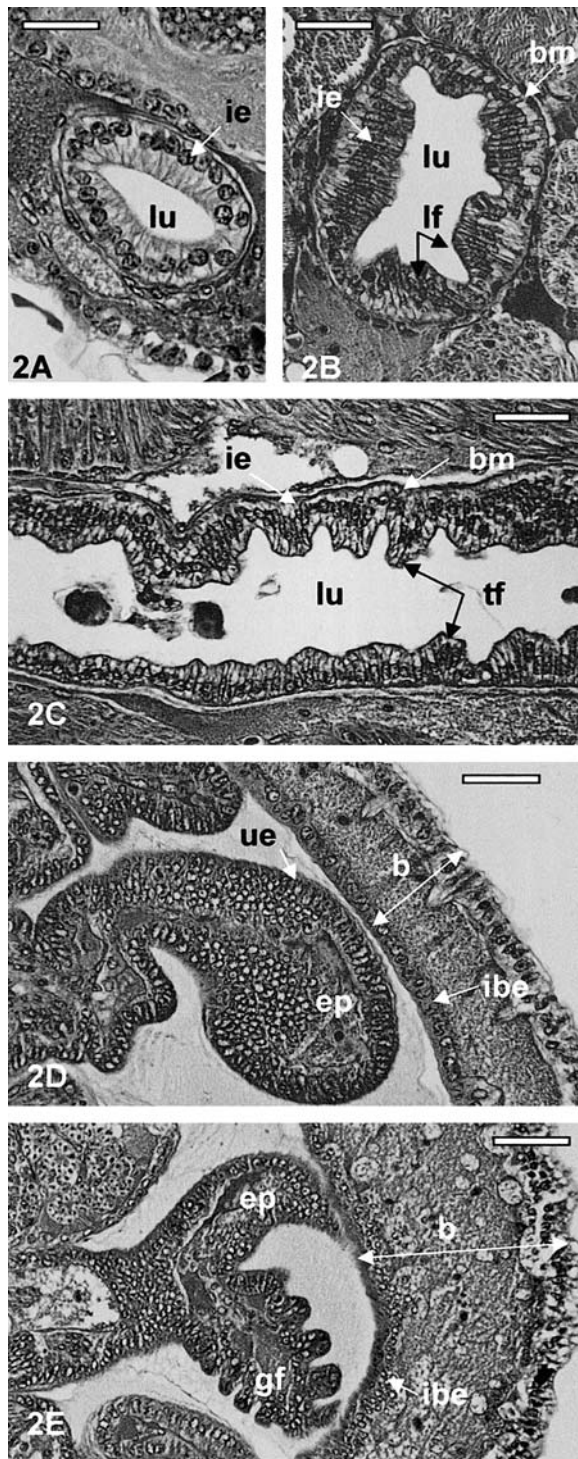

Fig. 2. *Homarus gammarus*. Light microscopy micrographs of the ontogeny of the intestine (A, B, C) and the branchial cavity (D, E). (A, D) EI : 425  $\mu\text{m}$ . (B, E) EI: 625  $\mu\text{m}$ . (C) Larval stage I. Abbreviations: b, branchiostegite; bm, basal membrane; ep, epipodite; ibe, inner-side branchiostegite epithelium; gf, gill filaments; ie, intestinal epithelium; lf, longitudinal fold; lu, lumen; tf, transversal fold; ue, undifferentiated epithelium. Bars: 30  $\mu\text{m}$  (A), 35  $\mu\text{m}$  (B, D), 40  $\mu\text{m}$  (C, E).

ectodermic sac of the antennal gland at EI 425  $\mu\text{m}$  (Fig. 3B). In embryos at EI 525  $\mu\text{m}$  (Fig. 3C), EI 625  $\mu\text{m}$  (Fig. 3E), and in larval stages I and II (Fig. 3F, G), a consistently intense immunoreactivity was observed in the epithelium sac of the antennal glands. Controls without the first antibody showed no specific binding within the antennal gland at EI 525  $\mu\text{m}$  (Fig. 3D). Immunofluorescence remained positive but weaker in larval stage III (Fig. 3H), in the labyrinth and in the bladder of the first post-larvae (stage IV) (Fig. 3I). In all stages no fluorescence was observed in the coelomosac cells of the antennal gland (Fig. 3B-I).

Intestine and the Branchial Cavity.—No specific fluorescence staining was observed in the cells of the intestine at EI 425 and 525  $\mu\text{m}$  (Fig. 4A, B), and in the branchial cavity at EI 425  $\mu\text{m}$  (Fig. 4G). The immunoreactivity of the  $\text{Na}^+, \text{K}^+$ -ATPase was first detected in the cells lining the intestine at EI 625  $\mu\text{m}$  (Fig. 4C). A strong immunoreactivity of the  $\text{Na}^+, \text{K}^+$ -ATPase was observed in the intestine epithelium from embryos EI 625 to post-larvae stage IV (Fig. 4C-F). The epipodites were the only immunopositive structure in the branchial cavity at EI 525  $\mu\text{m}$  (Fig. 4H) and EI 625  $\mu\text{m}$  (Fig. 4I). In post-larval stage V, a strong fluorescence was also found in the inner-side epithelium of the branchiostegite (Fig. 4J-L). In all epithelia, the fluorescence was mainly located at the basolateral side of the cells.

#### DISCUSSION

$\text{Na}^+, \text{K}^+$ -ATPase (sodium pump) provides the main driving force for transepithelial movement of monovalent ions across transporting tissues in many aquatic animals including the crustacean (Lucu and Towle, 2003). This enzyme is generally located in basolateral membranes, as in the gills (Péqueux, 1995; Freire and Mc Namara, 1995; Towle and Weihrauch, 2001; Lucu and Towle, 2003), and in the antennal gland (Mantel and Farmer, 1983; Holliday and Miller, 1984; Fuller et al., 1989; Sarver et al., 1994; Khodabandeh et al., 2002, 2005b, c) of crustaceans. These observations led to the suggestion that the maintenance of osmotic and ionic balance is directly related to the presence and level of  $\text{Na}^+, \text{K}^+$ -ATPase in these organs.

Antennal Gland.—In the adult lobster *H. gammarus*, the antennal gland is composed of a centrally located coelomosac surrounded, ventrally by a labyrinth divided into two parts (I and II), and dorsally by a voluminous bladder (see fig. 1 in Khodabandeh et al., 2005c). The labyrinth and bladder cells possess in common a number of ultrastructural cytological features of ionocytes and  $\text{Na}^+, \text{K}^+$ -ATPase has been detected in these cells (Khodabandeh et al., 2005c).

The antennal gland of the lobster *H. gammarus* develops progressively during both the embryonic and early post-embryonic phases. In meta-nauplius stage EI 150  $\mu\text{m}$ , the undifferentiated cells of the future antennal glands are situated near the base of the antennae. They form an ectodermic tubular epithelium and a mesodermic coelomosac at stage EI 225  $\mu\text{m}$ . During the following stages (embryo EI 325  $\mu\text{m}$  to larval stage III), the ectodermic tubular epithelium forms an ectodermic sac, from which the labyrinth and bladder develop, and the mesodermic sac forms the coelomosac. The definitive disposition of the three

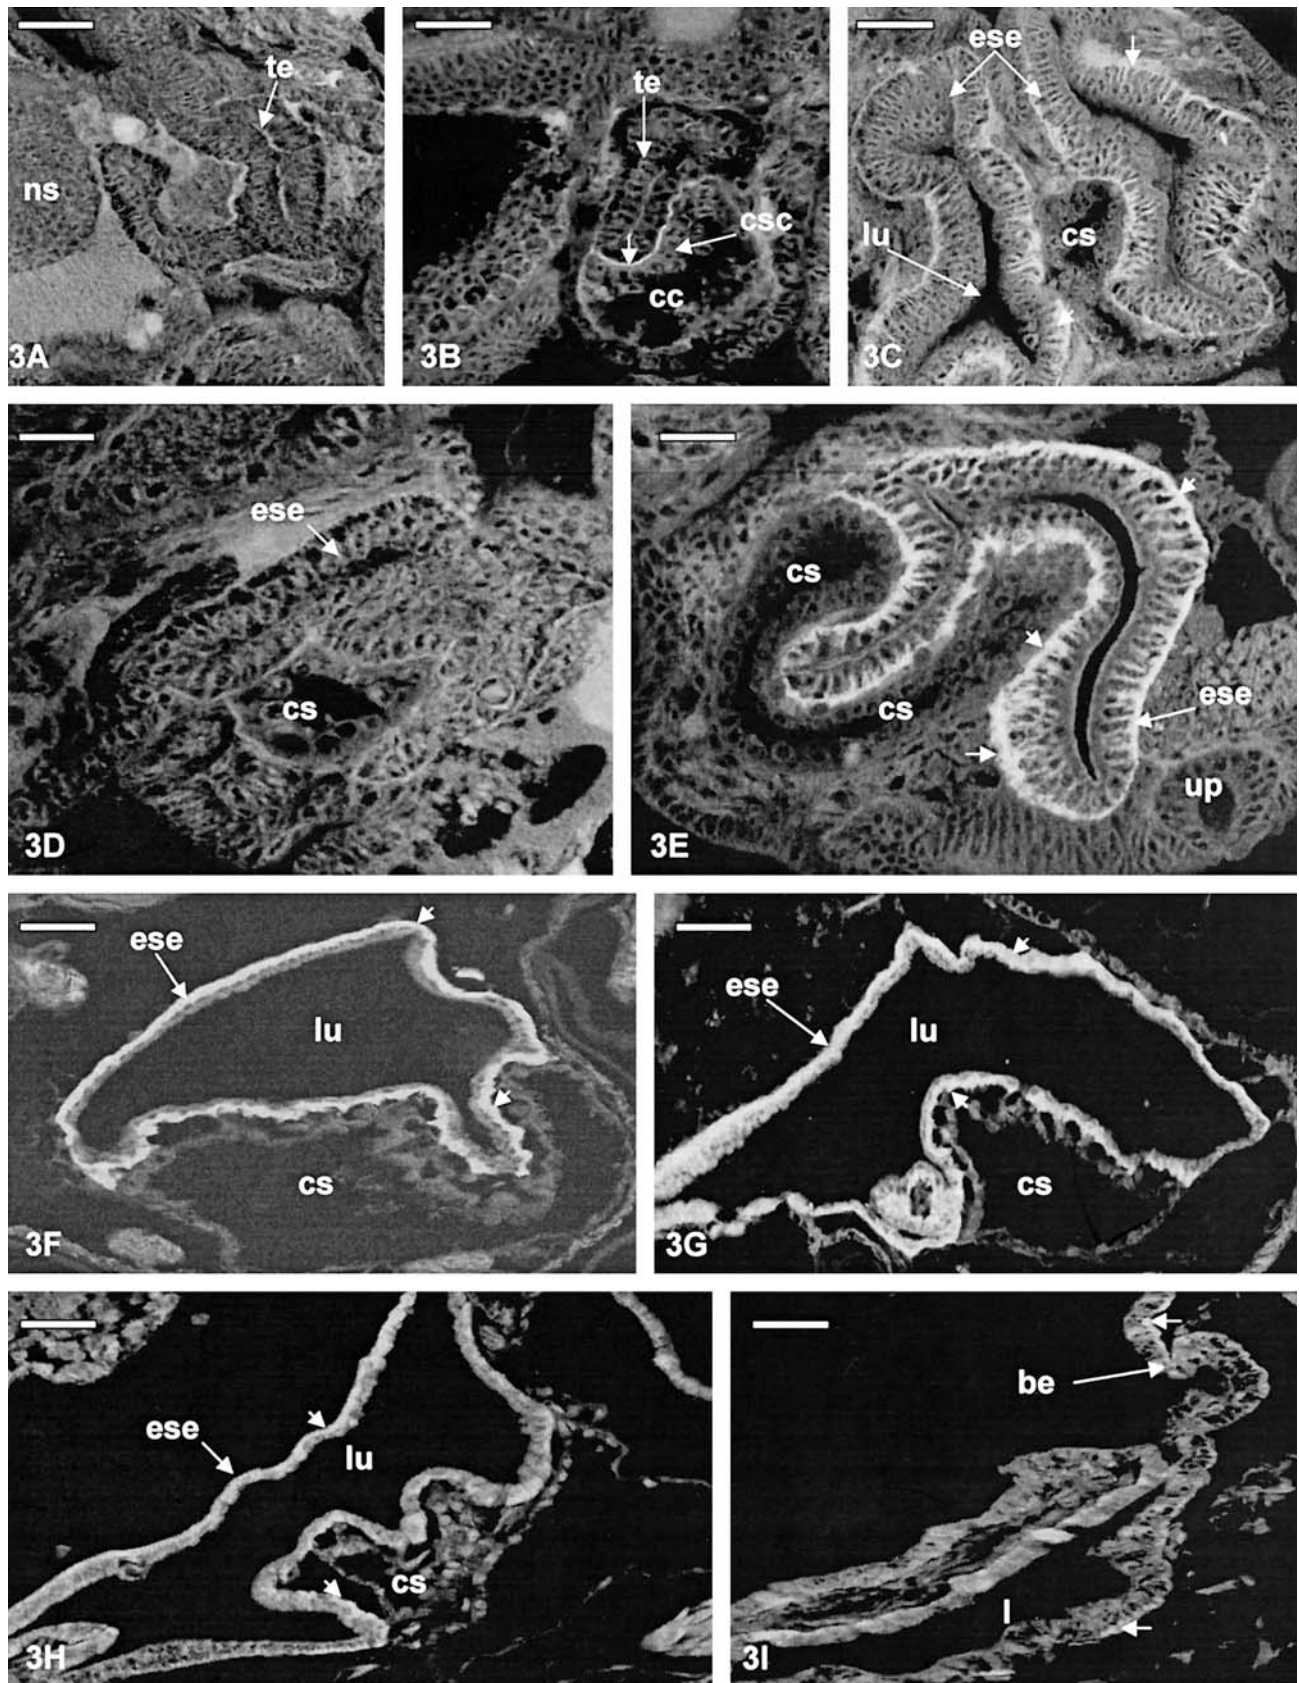

Fig. 3. *Homarus gammarus*. Immunolocalization of Na<sup>+</sup>,K<sup>+</sup>-ATPase during the ontogeny of the antennal glands. (A) EI: 325  $\mu$ m. (B) EI: 425  $\mu$ m. (C, D) EI: 525  $\mu$ m. (E) EI: 625  $\mu$ m. (F) Larval stage I. (G) Larval stage II. (H) Larval stage III. (I) Post-larvae stage IV. (A, B, C, E, F, G, H, I) Fluorescent micrographs. Free arrows indicate the location of Na<sup>+</sup>,K<sup>+</sup>-ATPase. (D) Control. Abbreviations: be, bladder epithelium; cc, coelomosac cavity; cs, coelomosac; csc, coelomosac cells; ese, ectodermic sac epithelium; l, labyrinth; lu, lumen; ns, nervous system, te, tubular epithelium; up, urinary pore. Bars: 80  $\mu$ m (A, B), 30  $\mu$ m (C, D, E), 100  $\mu$ m (F, G, H, I).

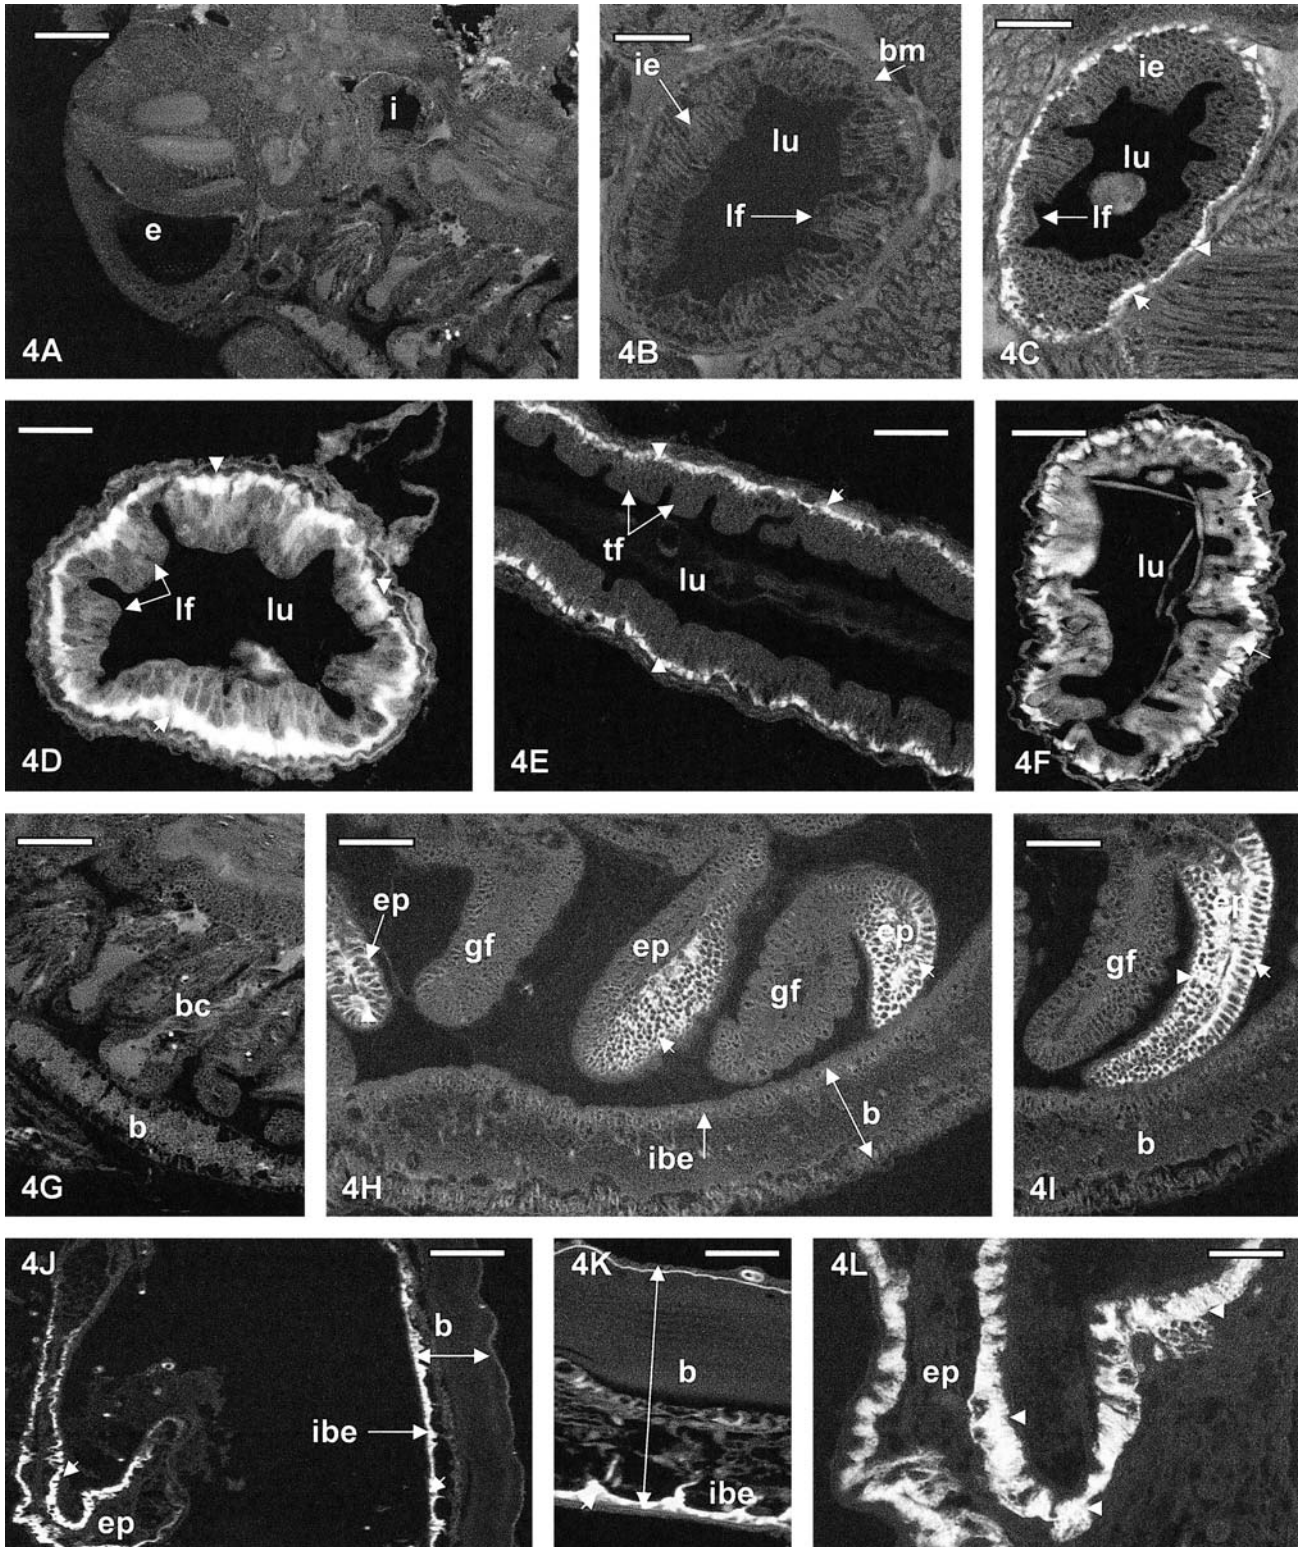

Fig. 4. *Homarus gammarus*. Immunolocalization of  $\text{Na}^+, \text{K}^+$ -ATPase during the ontogeny of the intestine (A-F) and branchial cavity (G-L). (A, G) EI: 425  $\mu\text{m}$ . (B, H) EI: 525  $\mu\text{m}$ . (C, I) EI: 625  $\mu\text{m}$ . (D) Larval stage I. (E) Larval stage II. (F) Post-larvae stage IV. (J-L) Post-larvae stage V. Free arrows indicate the location of  $\text{Na}^+, \text{K}^+$ -ATPase. Abbreviations: b, branchiostegite; bc, branchial cavity; bm, basal membrane; e, eye; ep, epipodite; ibe, inner-side branchiostegite epithelium; gf, gill filaments; i, intestine; ie, intestinal epithelium; lf, longitudinal fold; lu, lumen; tf, transversal fold. Bars: 100  $\mu\text{m}$  (A, G), 30  $\mu\text{m}$  (B), 35  $\mu\text{m}$  (C, D), 50  $\mu\text{m}$  (E, H, I), 150  $\mu\text{m}$  (J), 45  $\mu\text{m}$  (K), 40  $\mu\text{m}$  (F, L).

parts of the antennal gland found in adults is achieved later in post-larvae (stages IV, and V). According to Goodrich (1946), the coelomosac is the only mesodermal element in the crustacean antennal gland; the labyrinth, nephridial tubule, when present, and the bladder are all of ectodermal origin. There is no differentiated nephridial tubule in the lobster antennal gland as in the seawater crabs *Uca mordax* (Schmidt-Nielsen and Davis, 1968) and *Callinectes sapidus* (Johnson, 1980). The nephridial tubule has been yet observed only in species which produce an hypotonic urine such as freshwater species as the crayfish *Astacus leptodactylus* (Khodabandeh et al., 2005b). The occurrence of immunofluorescence for Na<sup>+</sup>,K<sup>+</sup>-ATPase is progressive in *H. gammarus* antennal glands, starting in embryos at EI 425 μm in the cells of the ectodermic sac epithelium, and its density seems to increase during the development of the labyrinth (embryo EI 525 μm to larval stage III). The Na<sup>+</sup>,K<sup>+</sup>-ATPase immunoreactivity then appears in the bladder in post-larvae. No immunoreactivity was detected in the coelomosac cells at any stage, larvae, post-larvae (this study) or adults (Khodabandeh et al., 2005c), a result already noted in the embryos and adults of *Astacus leptodactylus* (Khodabandeh et al., 2005a, b).

A comparison of the ontogeny of the antennal glands in lobsters and in other groups of marine decapods is hindered by the paucity of the related literature. In young post-embryonic stages, previous studies have shown that the antennal glands are present at the onset of larval development in *Palaemonetes* sp. (Hubschman, 1971) and in *Cancer anthonyi* (Trask, 1974), but whether the gland is fully functional before metamorphosis remains unclear (Anger, 2001).

In the crayfish *Astacus leptodactylus*, that lives in freshwater, the tubule and the labyrinth have been first observed at EI 190 μm (eye index; approximately 440 μm at hatching), the bladder and the coelomosac at EI 220 μm, and the definitive antennal glands at EI 350 μm (Khodabandeh et al., 2002, 2005a). In this species, the occurrence of immunofluorescence for Na<sup>+</sup>,K<sup>+</sup>-ATPase in different parts of the antennal glands starts in embryos at EI 220-350 μm (Khodabandeh et al., 2005b). We thus conclude that in the lobster *H. gammarus*, the formation of the definitive antennal gland and their ion uptake capabilities occur later than in *A. leptodactylus*. In the crayfish the antennal glands are probably functional just before hatching, enabling the juvenile I to produce a dilute urine, an adaptation essential to survive in freshwater. In the lobster, the definitive organization of the gland found in adults is only achieved in post-larvae after the metamorphosis. It could be related to the capacity of adults lobster to maintain at low salinities their urine concentration slightly below the hemolymph osmolality by 20-50 mosm/kg (Dall, 1970).

Intestine.—The intestine epithelium was lined at EI 425-525 μm by cuboidal to columnar cells with no Na<sup>+</sup>,K<sup>+</sup>-ATPase immunoreactivity. At EI 625 μm, it is lined by a columnar epithelium with longitudinal folds and Na<sup>+</sup>,K<sup>+</sup>-ATPase is first detectable at this stage. The presence of Na<sup>+</sup>,K<sup>+</sup>-ATPase in the intestine could support the idea that beside its implication in nutrient absorption, it may be also involved in osmoregulation. Previous reports indicate that in adults, the cells of various portions of the crustacean gut

are typical of salt-transporting absorption or secretory epithelia (Heeg and Cannone, 1966; Mantel, 1968; Holdich and Ratcliffe, 1970; Holdich and Mayes, 1975; Mykles, 1979; Farmer, 1980; Holliday, 1980; Palackal et al., 1984). Some studies have suggested that parts of the gut may be involved in movements of ions and water (Holliday et al., 1980; review in Péqueux, 1995). Experimental evidence suggests also a role of the gut in salt extrusion in aquatic hyporegulating species or in terrestrial species (Péqueux, 1995). Additional experiments will be necessary to conclude on the role of Na<sup>+</sup>,K<sup>+</sup>-ATPase in the intestine of *Homarus*.

Branchial Cavity.—The branchial cavity, with undifferentiated trichobranchiate gills and epipodites, is already formed in EI 325 μm. At EI 525-625 μm, the epipodite buds are lined on both sides by an epithelium made of columnar cells which possess a strong Na<sup>+</sup>,K<sup>+</sup>-ATPase immunoreactivity. We have detected no trace of Na<sup>+</sup>,K<sup>+</sup>-ATPase in the gill filament and in the external-side epithelium of the branchiostegites in embryonic, larval and post-larval stages. In post-larvae (stage V), an intense immunofluorescence of Na<sup>+</sup>,K<sup>+</sup>-ATPase was also detected in the inner-side epithelium of the branchiostegites. Previous structural studies on the branchial cavity in early developmental stages (larval stages I-III) of *H. gammarus* have shown that in sea water, only the epipodite cells present characteristic features of ionocytes, such as apical microvilli, basolateral infoldings, and a high mitochondria density (Haond et al., 1998). In individuals maintained at low salinity, the inner-side branchiostegite epithelia also possess ionocytes features but tissue differentiation appears mainly after metamorphosis (Haond et al., 1998). During the early developmental stages (embryos EI 520 μm to post-larval stage IV) of the same species, Lignot and Charmantier (2001) have observed the presence of Na<sup>+</sup>,K<sup>+</sup>-ATPase in the epipodites of all stages in sea water and in the inner-side branchiostegite epithelium of the first post-larvae and juveniles maintained at low salinity. From the combined observation from previous studies and from this study, we conclude that from embryo EI 525 μm to larval stages III, only the epipodites possess ionocytes with Na<sup>+</sup>,K<sup>+</sup>-ATPase immunoreactivity. After metamorphosis, ionocytes are also present in the inner-side of the branchiostegite epithelium; they appear more active at low salinity through profound ultrastructural changes and occurrence of high amounts of Na<sup>+</sup>,K<sup>+</sup>-ATPase. The gill epithelia showed no fluorescent staining at any of the embryonic and post-embryonic stages. As proposed by Lignot and Charmantier (2001) the gills are thus most probably involved in respiratory gas exchanges.

The involvement of different structures of the branchial chamber (epipodites, branchiostegites) and sometimes their functional shift during the development has been observed in an increasing number of species, *Penaeus japonicus* (Bouaricha et al., 1994), *Callinassa jamaicensis* (Felder et al., 1986), *Crangon crangon* (Cieluch et al., 2005). These structural changes are consistently related to an ontogenetic shift in the osmoregulatory pattern from the larval to the adult pattern. In *Homarus*, the involvement of the branchiostegites, beside the epipodites, in post-larval stages correspond to the shift from the osmoconforming larval type

of osmoregulation to the slightly hyper-iso osmoregulatory pattern observed in post-larvae and in adults (Dall, 1970; Charmantier et al., 1984, 2001).

The present study conducted in *H. gammarus* has revealed that a strong fluorescent staining indicating the presence of  $\text{Na}^+/\text{K}^+$ -ATPase, is present in the ionocytes of the labyrinth and bladder of the antennal glands, and also in the epipodites and branchiostegites of the branchial cavity in the late embryonic and post-embryonic stages. These observations highlight the early establishment of ion transport mechanisms and confirm the prominent role of these organs in osmoregulation throughout the development.

In conclusion, the ontogeny of the osmoregulatory tissues in *Homarus* is very progressive, not only during the embryonic phase but also during the larval phase. Their development is only achieved after metamorphosis and it conditions the occurrence of the ability to slightly hyper-osmoregulate at low salinity, the type of osmoregulation which is found in post-larvae and adult lobster.

#### ACKNOWLEDGEMENTS

Thanks are due to the University of Tarbiat Modarres and Ministry of Science, Research and Technology, Islamic Republic of Iran for financial aid and support. Special thanks also to Dr. Khosrov Piri, responsible for the student service in Paris, and F. Aujoulat, C. Blasco, E. Grousset, University of Montpellier II, for their technical help.

#### REFERENCES

- Anger, K. 2001. The Biology of Decapoda Crustacean Larvae, Crustacean Issues 14. A. A. Balkema, Lisse. 419 p.
- Barradas, C., J. M. Wilson, and S. Dunel-Erb. 1999.  $\text{Na}^+/\text{K}^+$ -ATPase activity and immunocytochemical labelling in podobranchial filament and lamina of the freshwater crayfish *Astacus leptodactylus* Eschscholtz: evidence for the existence of sodium transport in the filaments. *Tissue and Cell* 31: 523-528.
- Bouaricha, N., G. Charmantier, M. Charmantier-Daures, P. Thuet, and J.-P. Trilles. 1991a. Ontogénèse de l'osmoregulation chez la crevette *Penaeus japonicus*. *Cahiers de Biologie Marine* 322: 149-158.
- , M. Charmantier-Daures, P. Thuet, J.-P., Trilles, and G. Charmantier. 1991b. Ontogeny of osmoregulatory structures in the shrimp *Penaeus japonicus* (Crustacea, Decapoda). *Biological Bulletin* 186: 29-40.
- Campbell, P. J. 1986. Growth of tagged American lobster *Homarus americanus* in the Bay of Fundy. *Canadian Journal of Fisheries and Aquatic Science* 40: 1667-1675.
- , and M. B. Jones. 1990. Water permeability of *Palaemon longirostris* and other euryhaline caridean prawns. *Journal of Experimental Biology* 150: 145-158.
- Charmantier, G. 1998. Ontogeny of osmoregulation in crustaceans: a review. *Invertebrate Reproduction and Development* 33: 177-190.
- , and D. E. Aiken. 1987. Osmotic regulation in late embryos and prelarvae of the American lobster *Homarus americanus* (Crustacea, Decapoda). *Journal of Experimental Marine Biology and Ecology* 109: 101-108.
- , M. Charmantier-Daures, N. Bouaricha, P. Thuet, D. E. Aiken, and J.-P. Trilles. 1988. Ontogeny of osmoregulation and salinity tolerance in two decapod crustaceans: *Homarus americanus* and *Penaeus japonicus*. *Biological Bulletin* 175: 102-110.
- , and R. Mounet-Guillaume. 1992. Temperature specific rate of embryonic development of the European lobster *Homarus gammarus* (L.). *Journal of Experimental Marine Biology and Ecology* 160: 61-66.
- , P. Thuet, and M. Charmantier-Daures. 1984. La regulation osmotique et ionique chez *Homarus gammarus* (L.) (Crustacea: Decapoda). *Journal of Experimental Marine Biology and Ecology* 76: 191-199.
- , C. Haond, J. H. Lignot, and M. Charmantier-Daures. 2001. Ecophysiological adaptation to salinity throughout a life cycle: a review in homarid lobsters. *Journal of Experimental Biology* 204: 967-977.
- Cieluch, U., K. Anger, F. Aujoulat, F. Buchholz, M. Charmantier-Daures, and G. Charmantier. 2004. Ontogeny of osmoregulatory structures and functions in the green crab, *Carcinus maenas* (Crustacea, Decapoda). *Journal of Experimental Biology* 207: 325-335.
- , G. Charmantier, E. Grousset, M. Charmantier-Daures, and K. Anger. 2005. Osmoregulation, immunolocalization of  $\text{Na}^+/\text{K}^+$ -ATPase, and ultrastructure of branchial epithelia in the developing brown shrimp, *Crangon crangon* (Decapoda, Caridea). *Physiological and Biochemical Zoology* 78: 1017-1025.
- Dall, W. 1970. Osmoregulation in the lobster *Homarus americanus*. *Journal of Fisheries Research Board Canada* 27: 1123-1130.
- De Renzis, G., and M. Bomancin. 1984. Ion transport and gill ATPase. pp. 65-104. In: Hoar, W. S., D. J. Randall (eds.), *Fish physiology, gills*. Vol. XB. Academic Press, Orlando.
- Farmer, L. 1980. Evidence for hyporegulation in the calanoid copepod *Acartia tonsa*. *Comparative Biochemistry and Physiology* 65A: 359-362.
- Felder, J., D. Felder, and S. Hand. 1986. Ontogeny of the osmoregulation in the estuarine ghost shrimp *Callinectes jamaicensis* var. *louisianensis* Schmidt (Decapoda, Thalassinidae). *Journal of Experimental Marine Biology and Ecology* 99: 91-105.
- Freire, C. A., and J. C. Mc Namara. 1995. Fine structure of the gills of the fresh-water shrimp *Macrobrachium olfersii* (Decapoda): effect of acclimation to high salinity medium and evidence for involvement of the lamellar septum in ion uptake. *Journal of Crustacean Biology* 15: 103-116.
- Fuller, E. G., G. J. Highison, F. Brown, and C. Bayer. 1989. Ultrastructure of the crayfish antennal gland revealed by scanning and transmission electron microscopy combined with ultrasonic microdissection. *Journal of Morphology* 200: 9-15.
- Green, J. W., H. Harsch, L. Barr, and C. L. Prosser. 1959. The regulation of water and salt by the fiddler crab *Uca pugnax* and *Uca pugilator*. *Biological Bulletin* 116: 76-87.
- Goodrich, E. S. 1946. Nephridia and genital ducts since 1895. *Quarterly Journal of Microscopic Science* 68: 113-393.
- Haond, C., G. Flik, and G. Charmantier. 1998. Confocal laser scanning and electron microscopical studies on osmoregulatory epithelia in the branchial cavity of the lobster *Homarus gammarus*. *Journal of Experimental Biology* 201: 1817-1833.
- Heeg, J., and J. Cannone. 1966. Osmoregulation by means of a hitherto unsuspected osmoregulatory organ in two grapsid crabs. *Zoologica Africana* 2: 127-129.
- Holdich, D. M., and N. Ratcliffe. 1970. A light and electron microscopic study of the hindgut of the herbivorous isopod *Dynamene bidentata* (Crustacea, Pericarida). *Zeitschrift für Zellforschung und mikroskopische Anatomie* 11: 209-227.
- , and K. R. Mayes. 1975. A fine structural re-examination of the so-called midgut of the isopod Porcellio. *Crustaceana* 29: 186-192.
- Holliday, C. W. 1980. Magnesium transport by the urinary bladder of the crab, *Cancer magister* (Dana). *Journal of Experimental Biology* 85: 187-201.
- , and D. S. Miller. 1984. Cellular mechanisms of organic anion transport in crustacean renal tissue. *American Zoologist* 24: 275-284.
- , D. L. Mykles, R. C. Terwilliger, and L. J. Dangott. 1980. Fluid secretion by the midgut caeca of the crab *Cancer magister*. *Journal of Experimental Biology* 85: 187-201.
- Hubschman, J. H. 1971. Transient larval glands in *Palaemonetes*. In: D. J. Crisp, ed. *Fourth European Mar. Biol. Symposium*. Cambridge University Press, New York.
- Hughes, J. T., R. A. Shleser, and G. Tchobanoglous. 1974. A rearing tank for lobster and other aquatic species. *The Progressive Fish-Culturist* 36: 129-133.
- Johnson, P. T. 1980. *Histology of the Blue Crab Callinectes sapidus*. Praeger, New York.
- Jury, S. H., M. T. Kinnison, W. H. Howell, and W. H. Watson, III. 1994. The behaviour of lobsters in response to reduced salinity. *Journal of Experimental Marine Biology and Ecology* 180: 23-37.
- Khodabandeh, S., M. Kutnik, M. Charmantier-Daures, and G. Charmantier. 2002. Ontogeny of the antennal glands in the Crayfish *Astacus leptodactylus*. *Integrative and Comparative Biology* 42: 1255.
- , G. Charmantier, C. Blasco, E. Grousset, and M. Charmantier-Daures. 2005a. Ontogeny of the antennal glands in the Crayfish, *Astacus leptodactylus* (Crustacea, Decapoda): anatomical and cell differentiation. *Cell & Tissue Research* 319: 153-165.



- , M. Kutnik, F. Aujoulat, G. Charmantier, and M. Charmantier-Daures. 2005b. Ontogeny of the antennal glands in the Crayfish, *Astacus leptodactylus* (Crustacea, Decapoda): immunolocalisation of Na<sup>+</sup>,K<sup>+</sup>-ATPase. *Cell & Tissue Research* 319: 167-174.
- , G. Charmantier, and M. Charmantier-Daures. 2005c. Ultrastructural studies and Na<sup>+</sup>,K<sup>+</sup>-ATPase immunolocalization in the antennal urinary glands of the lobster *Homarus gammarus* (Crustacea, Decapoda). *Journal of Histochemistry & Cytochemistry* 53: 1203-1214.
- Lawton, P., and K. L. Lavalli. 1995. Postlarval, juvenile, adolescent, and adult ecology. In, J. R. Factor (ed.), *Biology of the lobster Homarus americanus*. Academic Press, New York.
- Lignot, J. H., M. Charmantier-Daures, and G. Charmantier. 1999. Immunolocalization of Na<sup>+</sup>,K<sup>+</sup>-ATPase in the organs of the branchial cavity of the European lobster *Homarus gammarus* (Crustacea, Decapoda). *Cell and Tissue Research* 296: 417-426.
- , and G. Charmantier. 2001. Immunolocalization of Na<sup>+</sup>,K<sup>+</sup>-ATPase in the branchial cavity during the early development of the European lobster *Homarus gammarus* (Crustacea, Decapoda). *Journal of Histochemistry and Cytochemistry* 49: 1013-1023.
- , G. N. Susanto, M. Charmantier-Daures, and G. Charmantier. 2005. Immunolocalization of Na<sup>+</sup>,K<sup>+</sup>-ATPase in the branchial cavity during the early development of the crayfish *Astacus leptodactylus* (Crustacea, Decapoda). *Cell and Tissue Research* 319: 331-339.
- Lucu, C., and D. W. Towle. 2003. Na<sup>+</sup>,K<sup>+</sup>-ATPase in the gills of aquatic crustacea. *Journal of Comparative Biochemistry and Physiology* 135 A: 195-214.
- Mantel, L. H. 1968. The foregut of *Gecarcinus lateralis* as an organ of salt and water balance. *American Zoologist* 8: 433-442.
- , and L. L. Farmer. 1983. Osmotic and ionic regulation. pp. 53-161. In, D. E. Bliss (ed.), *The Biology of Crustacea*. Vol. 5. Internal Anatomy and Physiological Regulation. Academic Press, London.
- Mykles, D. L. 1977. The ultrastructure of the posterior midgut caecum of *Pachygrapsus crassipes* (Decapoda, Brachyura) adapted to low salinity. *Tissue and Cell* 9: 681-691.
- . 1979. Ultrastructure of alimentary epithelia of lobsters, *Homarus americanus* and *H. gammarus* and crab, *Cancer magister*. *Zoomorphology* 92: 201-215.
- Palackal, T., L. Faso, J. L. Zung, G. Vernon, and R. Witkus. 1984. The ultrastructure of the hindgut epithelium of terrestrial isopods and its role in osmoregulation. *Symposia of the Zoological Society of London* 53: 185-198.
- Péqueux, A. 1995. Osmotic regulation in crustaceans. *Journal of Crustacean Biology* 15: 1-60.
- Perkins, H. C. 1972. Developmental rates at various temperatures of embryos of the northern lobster (*Homarus americanus* Milne-Edwards). *Fisheries Bulletin* 70: 95-99.
- Sarver, R. G., M. A. Flynn, and C. W. Holliday. 1994. Renal Na, K-ATPase and osmoregulation in the crayfish, *Procambarus clarkii*. *Comparative Biochemistry and Physiology* 107A: 349-356.
- Schmidt-Nielsen, B., and L. E. Davis. 1968. Transport and tubular intercellular spaces in reptilian kidneys. *Science* 159: 1105-1108.
- Thuet, P., M. Charmantier-Daures, and G. Charmantier. 1988. Relation entre osmorégulation et activités d'ATPase Na<sup>+</sup>,K<sup>+</sup> et d'anhydrase chez larves et postlarves de *Homarus gammarus* (L.) (Crustacea: Decapoda). *Journal of Experimental Marine Biology and Ecology* 115: 249-261.
- Towle, D. W. 1981. Role of Na<sup>+</sup>,K<sup>+</sup>-ATPase in ionic regulation by marine and estuarine animals. *Marine Biology Letter* 2: 107-121.
- . 1984a. Membrane-bound ATPase in arthropod ion-transporting tissues. *American Zoologist* 24: 77-185.
- . 1984b. Regulatory functions of Na<sup>+</sup>,K<sup>+</sup>-ATPase in marine and estuarine animals. pp. 157-170. In, A. Péqueux, L. Bolis (eds.), Heidelberg. Springer Verlag, New York, Tokyo.
- , and D. Weihrauch. 2001. Osmoregulation by gills of euryhaline crabs: molecular analysis of transporters. *American Zoologist* 41: 770-788.
- Trask, T. 1974. Laboratory-reared larvae of *Cancer anthonyi* (Decapoda: Brachyura) with a brief description of the internal anatomy of the megalopa. *Marine Biology* 27: 63-74.
- Ziegler, A. 1997. Immunocytochemical localization of Na<sup>+</sup>,K<sup>+</sup>-ATPase in the calcium transporting sternal epithelium of the terrestrial isopod *Porcellio scaber* L (Crustacea). *Journal of Histochemistry and Cytochemistry* 45: 437-446.

RECEIVED: 28 February 2005.

ACCEPTED: 14 April 2006.
